# Supplementary material
Source: PubMed Central journal article supplement (PMC4587689)
Supplement: ASN.2014070665_ASN2014070665SupplementaryData.pdf [file ASN.2014070665_ASN2014070665SupplementaryData.pdf]

## **SUPPLEMENTAL MATERIAL**

### **COMPLETE METHODS**

#### **Animals**

Mice were maintained on a 12-h light/dark cycle and were given access to a standard laboratory diet and water ad libitum. To evaluate the effects of diabetic therapy on the changes in DNA methylation, we administered pioglitazone (Takeda Pharmaceutical, Osaka, Japan), a peroxisome proliferator-activated receptor- $\gamma$  agonist, to 5-week-old *db/db* mice for 3 weeks. Pioglitazone was mixed with normal mouse chow and administered at the dose of 15 mg/kg body wt/day, because 15 mg/kg of pioglitazone has been reported to attenuate albuminuria and changes of glomerular gene expression.<sup>1</sup>

Mice were killed under anesthesia with pentobarbital. Blood glucose levels were determined with G-checker, a compact glucose analyzer (GUNZE, Tokyo, Japan).

Triglyceride and non-esterified fatty acids were measured using L-type Wako TG-H kit (Wako Pure Chemical Industries, Tokyo, Japan) and NEFA SS kit (Eiken Co. Ltd., Tochigi, Japan), respectively. The urinary albumin concentration was measured using the mouse ELISA kit (Shibayagi, Gunma, Japan).

#### **Cell Culture**

To determine the effect of decreased DNA methylation on gene expression, HRPTEC

were treated with 100 nM 5-Aza-2'-deoxycytidine for 96 hours and harvested. For evaluation of the effects of HDAC inhibition, HRPTEC were incubated with TSA (300 nM) for 24 hours and harvested. For the combination of DNA demethylation and HDAC inhibition, cells were incubated with 100 nM 5-Aza-2'-deoxycytidine for 96 hours in combination with 300 nM TSA for the last 24 hours.

### **Sorting of the PT Cells**

The whole kidneys were cut into 5-mm<sup>3</sup> pieces with tweezers and scalpel in a Petri dish on ice. The pieces were loaded into a Medicone chamber (CTSV, Turin, Italy), and disaggregated into single cells by microblades spinning at a constant rate of 100 rpm. Cells were stained with fluorescein isothiocyanate-conjugated Lotus tetragonolobus lectin (Vector Laboratories, Burlingame, CA) as the marker of PT.<sup>2,3</sup> DNA and total RNA were extracted with AllPrep DNA/RNA Mini (QIAGEN K.K., Tokyo, Japan).

### **Genome-wide DNA Methylation Analysis**

In the D-REAM assay, DNA methylation status at HpyCH4IV sites were indicated by hybridization signals of GeneChip Mouse Promoter 1.0R Array (Affymetrix) with probes mapped to the 8.5-kb regions around transcription start sites of the RefSeq genes in the mouse genome (Build 37.1). Microarray signals were processed by MAT,<sup>4</sup> and converted to D-REAM scores of fragments digested in silico by HpyCH4IV. The

microarray data of the PT cells isolated in duplicate can be found at Array Express ([www.ebi.ac.uk/arrayexpress/](http://www.ebi.ac.uk/arrayexpress/), accession number E-MTAB-2620). By comparing the data of the PT cells (*db/m*) data with those of the liver, cerebrum, and kidney of C57BL/6J mice,<sup>5, 6</sup> we selected DMRs from HpyCH4IV sites that exhibited significantly different D-REAM scores at cut-off p-value of  $10^{-5}$ . The genes neighboring the DMRs were identified using the Galaxy web server.<sup>7, 8</sup> The gene ontology analysis was carried out using the DAVID web server.<sup>9</sup>

### **Combined bisulfite restriction analysis (COBRA) and bisulfite sequencing**

Bisulfite conversion of 150-500 ng genomic DNA was performed with the EZ DNA Methylation Kit (Zymo Research, Irvine, CA). The DNA fragments containing the DMRs were amplified by PCR. PCR was performed using Immolase DNA Polymerase (Bioline, London, UK) under the following conditions: 95 °C for 7 min; 43 cycles at 94 °C for 1 min, 55 °C or 50°C for 30 s, and 72 °C for 1 min; the final extension step at 72 °C for 10 min. For quantitative-COBRA, the PCR products were digested with HpyCH4IV, a methylation-sensitive restriction enzyme. After purification by gel filtration with Sephadex G-50 (GE Healthcare Life Sciences, Buckinghamshire, UK), the purified PCR products were analyzed with MutiNA, a microchip electrophoresis system (Shimadzu, Kyoto, Japan) and the methylation levels were quantified. For

bisulfite sequencing of the Agt promoter, PCR products were cloned into the pGEM-T Easy vector (Promega, Madison, WI, USA), and at least 20 clones were chosen randomly from each sample and sequenced. Methylation sites were visualized by the web-based tool, "QUMA" (<http://quma.cdb.riken.jp/>).

### **Quantitative RT-PCR analysis**

For quantitative RT-PCR analysis, the cDNA product was generated using a high-capacity cDNA archive kit (Applied Biosystems). The expression levels of Agt (mouse), AGT (human),  $\beta$ -actin, GAPDH, and Abcc4 were then analyzed using the TaqMan Universal PCR Master Mix (Applied Biosystems). For detection of other genes, SYBR Green PCR Master Mix (Applied Biosystems) was used. The primers and probes of Agt (mouse), AGT (human),  $\beta$ -actin, GAPDH, Abcc4, and 18S ribosomal RNA were obtained from Applied Biosystems. Expression levels were normalized to those of 18S ribosomal RNA for experiments using the whole kidney and those of  $\beta$ -actin for other experiments with mice. GAPDH was used for normalization in experiments with HRPTEC.

### **In Situ Hybridization**

Kidneys were fixed with Tissue Fixative (GenoStaff, Inc., Tokyo, Japan), then embedded in paraffin and sectioned at 6  $\mu$ m. In situ hybridization was performed

according to a previously described method.<sup>10</sup> For generation of antisense and sense cRNA probes, a 541-bp DNA fragment corresponding to the nucleotide positions 5–545 of the mouse gene for *Agt* (GenBank accession number NM\_007428) was used. Sense probes were used as hybridization control. The bound label was detected using NBT-BCIP solution (Sigma), an alkaline phosphate color substrate.

### **ChIP Assay**

Frozen kidneys were pulverized by mortar and pestle to a powder before fixation with 10% formaldehyde. ChIP assay was performed in the kidney or HRPTEC as described previously.<sup>11</sup> Immunoprecipitated DNA was quantified by quantitative-real time PCR using SYBR Green PCR Master Mix. The enrichment of DNA in the immunoprecipitates was calculated relative to the input samples.

### **REFERENCES**

1. Makino H, Miyamoto Y, Sawai K, Mori K, Mukoyama M, Nakao K, Yoshimasa Y, Suga S: Altered gene expression related to glomerulogenesis and podocyte structure in early diabetic nephropathy of db/db mice and its restoration by pioglitazone. *Diabetes* 55: 2747-2756, 2006
2. Cachat F, Lange-Sperandio B, Chang AY, Kiley SC, Thornhill BA, Forbes MS,

- Chevalier RL: Ureteral obstruction in neonatal mice elicits segment-specific tubular cell responses leading to nephron loss. *Kidney Int* 63: 564-575, 2003
3. Hiesberger T, Bai Y, Shao X, McNally BT, Sinclair AM, Tian X, Somlo S, Igarashi P: Mutation of hepatocyte nuclear factor-1beta inhibits Pkhd1 gene expression and produces renal cysts in mice. *J Clin Invest* 113: 814-825, 2004
  4. Johnson WE, Li W, Meyer CA, Gottardo R, Carroll JS, Brown M, Liu XS: Model-based analysis of tiling-arrays for ChIP-chip. *Proc Natl Acad Sci U S A* 103: 12457-12462, 2006
  5. Kikuchi R, Yagi S, Kusuhara H, Imai S, Sugiyama Y, Shiota K: Genome-wide analysis of epigenetic signatures for kidney-specific transporters. *Kidney Int* 78: 569-577, 2010
  6. Yagi S, Hirabayashi K, Sato S, Li W, Takahashi Y, Hirakawa T, Wu G, Hattori N, Ohgane J, Tanaka S, Liu XS, Shiota K: DNA methylation profile of tissue-dependent and differentially methylated regions (T-DMRs) in mouse promoter regions demonstrating tissue-specific gene expression. *Genome Res* 18: 1969-1978, 2008
  7. Goecks J, Nekrutenko A, Taylor J: Galaxy: a comprehensive approach for supporting accessible, reproducible, and transparent computational research in the

- life sciences. *Genome Biol* 11: R86, 2010
8. Karolchik D, Hinrichs AS, Furey TS, Roskin KM, Sugnet CW, Haussler D, Kent WJ: The UCSC Table Browser data retrieval tool. *Nucleic Acids Res* 32: D493-496, 2004
  9. Huang da W, Sherman BT, Tan Q, Kir J, Liu D, Bryant D, Guo Y, Stephens R, Baseler MW, Lane HC, Lempicki RA: DAVID Bioinformatics Resources: expanded annotation database and novel algorithms to better extract biology from large gene lists. *Nucleic Acids Res* 35: W169-175, 2007
  10. Tomizuka K, Horikoshi K, Kitada R, Sugawara Y, Iba Y, Kojima A, Yoshitome A, Yamawaki K, Amagai M, Inoue A, Oshima T, Kakitani M: R-spondin1 plays an essential role in ovarian development through positively regulating Wnt-4 signaling. *Hum Mol Genet* 17: 1278-1291, 2008
  11. Yoshikawa M, Hishikawa K, Marumo T, Fujita T: Inhibition of histone deacetylase activity suppresses epithelial-to-mesenchymal transition induced by TGF-beta1 in human renal epithelial cells. *J Am Soc Nephrol* 18: 58-65, 2007

## FIGURE LEGENDS

**Supplemental Figure 1.** Characterization of PT-DMRs identified by D-REAM.

(A) 6387 PT-DMRs hypomethylated relative to the reference tissues, kidney, liver, and cerebrum, were classified as DMRs unique to a tissue or common to comparisons with at least two tissues.

(B) 5647 PT-DMRs hypermethylated relative to the reference tissues were classified in the same manner as in (A).

**Supplemental Figure 2.** Validation of the sorted kidney cells obtained from 10 week-old *db/db* mice.

Expressions of the marker genes of proximal tubules (*Sglt2* and *Pck1*), thick ascending loop of Henle (*NKCC2*), distal tubules (*NCC*) and collecting duct ( $\beta$ ENaC) in the PT and non-PT fractions (n = 4-5 per group; \*p < 0.05). In this and all other supplemental figures, error bars represent mean  $\pm$  SEM.

**Supplemental Figure 3.** Aberrant DNA methylation induced by diabetes in the PT cells.

(A) DNA methylation status of the target genes in the PT fraction obtained from 8-10 week-old *db/m* and *db/db* mice is shown (n = 5-9 per group; \*p < 0.05).

(B) Expression levels of the genes described in (A) are shown. *Cldn 18* mRNA was not



detected (n = 5 per group; \*p < 0.05).

**Supplemental Figure 4.** Blood glucose levels and body weight of 5- and 8-week old *db/m* and *db/db* mice (n = 13 per group; \*p < 0.05).

**Supplemental Figure 5.** Differential effects of pioglitazone on *db/db* mice.

(A, B) Urinary albumin excretion in 24 hours (A) and the plasma levels of triglyceride and non-esterified fatty acid (NEFA) (B) were determined at the end of 3 weeks' administration of pioglitazone to *db/db* mice (n = 6 per group; \*p < 0.05).

(C) *Acaca* mRNA expression with and without pioglitazone treatment in the PT cells. The mRNA levels in the PT cells obtained from *db/m* and *db/db* mice after 3 weeks' administration of pioglitazone or normal chow were quantified by quantitative RT-PCR (n=5 per group; \*p < 0.05).

(D) DNA methylation status of *Cldn18* with and without pioglitazone treatment. PT cells were collected from *db/m* and *db/db* mice after 3-weeks' administration of pioglitazone or normal chow. DNA methylation of *Cldn18* was analyzed by COBRA (n=5 per group; \*p < 0.05). The CpG site of *Cldn18* is indicated in Table 1. n.s. denotes not significant.

**Supplemental Figure 6.** Persistent histone modifications resistant to antidiabetic therapy with pioglitazone.

Histone H3K9 acetylation (A) and H3K4 tri-methylation (B) of the promoters of *Agt*,

*Abcc4*, and *Slc1a1* in the kidneys of *db/m* and *db/db* mice after 3-weeks'

administration of pioglitazone or normal chow (n = 4-8 per group; \*p < 0.05 vs control

mice). n.s. denotes not significant.

**Supplemental Table 1.** Tissue specificity of transcripts from genes associated with hypo-DMRs in the PT cells.

| Comparison              | Term          | Count | P value                |
|-------------------------|---------------|-------|------------------------|
| Kidney<br>(1336/1935)   | Embryo        | 206   | $2.02 \times 10^{-10}$ |
|                         | Mammary tumor | 242   | $1.94 \times 10^{-8}$  |
|                         | Brain         | 563   | $1.71 \times 10^{-7}$  |
|                         | Thymus        | 223   | $3.51 \times 10^{-7}$  |
|                         | Eye           | 139   | $1.72 \times 10^{-5}$  |
|                         | Hippocampus   | 103   | $3.64 \times 10^{-5}$  |
|                         | Kidney        | 186   | $6.07 \times 10^{-5}$  |
| Liver<br>(1148/1643)    | Mammary tumor | 226   | $2.77 \times 10^{-11}$ |
|                         | Kidney        | 173   | $1.05 \times 10^{-6}$  |
|                         | Embryo        | 161   | $8.66 \times 10^{-6}$  |
|                         | Bone marrow   | 118   | $1.22 \times 10^{-5}$  |
|                         | Mammary gland | 161   | $4.13 \times 10^{-5}$  |
| Cerebrum<br>(1491/2037) | Kidney        | 247   | $3.17 \times 10^{-13}$ |
|                         | Liver         | 327   | $9.66 \times 10^{-8}$  |
| Common<br>(1057/1455)   | Kidney        | 165   | $6.62 \times 10^{-9}$  |
|                         | Liver         | 220   | $7.58 \times 10^{-6}$  |
|                         | Spleen        | 78    | $7.34 \times 10^{-5}$  |

Refseq transcripts harboring PT-DMRs between 6.0 kb upstream and 2.5kb downstream from their TSS were analyzed using the DAVID web server (<http://niaid.abcc.ncifcrf.gov>) for their tissue specificity of expression. Significantly (P-value less than  $1.0 \times 10^{-4}$ ) enriched terms in the "Uniprot tissue" (UP\_TISSUE), which are classified based on literature mining and reports for each gene, are indicated. PT-DMRs hypomethylated relative to the each reference tissue, namely the kidney, liver,

and cerebrum, and common to comparisons with at least two tissues are separately demonstrated. The numbers of DAVID IDs and their corresponding Refseq IDs associated with the PT-DMRs are indicated within parentheses in the left column. Counts indicate the number of genes involved in the term.

**Supplemental Table 2.** Tissue specificity of transcripts from genes associated with hyper-DMRs in the PT cells.

| Comparison              | Term          | Count | P value                |
|-------------------------|---------------|-------|------------------------|
| Kidney<br>(1565/2128)   | Forelimb      | 23    | $2.59 \times 10^{-4}$  |
| Liver<br>(1202/1604)    | Liver         | 326   | $2.34 \times 10^{-26}$ |
|                         | Plasma        | 25    | $6.58 \times 10^{-11}$ |
|                         | Kidney        | 159   | $8.63 \times 10^{-5}$  |
| Cerebrum<br>(1342/1921) | Brain         | 582   | $4.78 \times 10^{-10}$ |
|                         | Eye           | 155   | $7.60 \times 10^{-9}$  |
|                         | Mammary tumor | 240   | $5.96 \times 10^{-8}$  |
|                         | Cerebellum    | 154   | $3.45 \times 10^{-7}$  |
|                         | Hippocampus   | 111   | $6.44 \times 10^{-7}$  |
|                         | Brain cortex  | 72    | $1.39 \times 10^{-6}$  |
|                         | Embryo        | 187   | $2.22 \times 10^{-6}$  |
| Common<br>(482/685)     | brain         | 205   | $6.15 \times 10^{-4}$  |

Tissue specificity of expression from the Refseq genes was analyzed in the same way as that for the analysis shown in Supplemental Table 1. There was no term with a P value of less than  $1.0 \times 10^{-4}$  in the genes associated with PT-DMRs hypermethylated relative to the whole kidney and common to two tissues.

**Supplemental Table 3.** Functions of genes associated with hypomethylated PT-DMRs.

| Enrichment Score | Category        | Term                                          | Count | P value                  |
|------------------|-----------------|-----------------------------------------------|-------|--------------------------|
| 7.77             | GOTERM_CC_FAT   | GO:0005739~mitochondrion                      | 111   | 7.13 x 10 <sup>-17</sup> |
|                  | SP_PIR_KEYWORDS | mitochondrion                                 | 71    | 5.16 x 10 <sup>-13</sup> |
|                  | GOTERM_CC_FAT   | GO:0044429~mitochondrial part                 | 53    | 7.84 x 10 <sup>-11</sup> |
|                  | GOTERM_CC_FAT   | GO:0019866~organelle inner membrane           | 34    | 5.90 x 10 <sup>-8</sup>  |
|                  | GOTERM_CC_FAT   | GO:0031966~mitochondrial membrane             | 37    | 1.08 x 10 <sup>-7</sup>  |
|                  | GOTERM_CC_FAT   | GO:0005743~mitochondrial inner membrane       | 32    | 1.89 x 10 <sup>-7</sup>  |
|                  | GOTERM_CC_FAT   | GO:0005740~mitochondrial envelope             | 37    | 4.85 x 10 <sup>-7</sup>  |
|                  | GOTERM_CC_FAT   | GO:0031967~organelle envelope                 | 44    | 1.90 x 10 <sup>-6</sup>  |
|                  | GOTERM_CC_FAT   | GO:0031975~envelope                           | 44    | 2.18 x 10 <sup>-6</sup>  |
|                  | SP_PIR_KEYWORDS | mitochondrion inner membrane                  | 19    | 7.26 x 10 <sup>-5</sup>  |
|                  | GOTERM_CC_FAT   | GO:0031090~organelle membrane                 | 53    | 7.30 x 10 <sup>-5</sup>  |
| 5.28             | SP_PIR_KEYWORDS | transit peptide                               | 39    | 6.65 x 10 <sup>-7</sup>  |
|                  | GOTERM_CC_FAT   | GO:0005759~mitochondrial matrix               | 20    | 9.99 x 10 <sup>-6</sup>  |
|                  | GOTERM_CC_FAT   | GO:0031980~mitochondrial lumen                | 20    | 9.99 x 10 <sup>-6</sup>  |
|                  | UP_SEQ_FEATURE  | transit peptide:Mitochondrion                 | 38    | 1.14 x 10 <sup>-5</sup>  |
| 4.18             | SP_PIR_KEYWORDS | ribonucleoprotein                             | 26    | 6.89 x 10 <sup>-6</sup>  |
|                  | KEGG_PATHWAY    | mmu03010:Ribosome                             | 15    | 8.81 x 10 <sup>-6</sup>  |
|                  | SP_PIR_KEYWORDS | ribosome                                      | 8     | 8.98 x 10 <sup>-6</sup>  |
|                  | GOTERM_BP_FAT   | GO:0006412~translation                        | 28    | 1.08 x 10 <sup>-5</sup>  |
|                  | SP_PIR_KEYWORDS | ribosomal protein                             | 20    | 1.36 x 10 <sup>-5</sup>  |
|                  | GOTERM_MF_FAT   | GO:0003735~structural constituent of ribosome | 18    | 1.53 x 10 <sup>-5</sup>  |
|                  | GOTERM_CC_FAT   | GO:0005840~ribosome                           | 20    | 9.84 x 10 <sup>-5</sup>  |
|                  | SP_PIR_KEYWORDS | protein biosynthesis                          | 16    | 1.01 x 10 <sup>-4</sup>  |
|                  | GOTERM_CC_FAT   | GO:0033279~ribosomal subunit                  | 10    | 7.08 x 10 <sup>-4</sup>  |
|                  | GOTERM_MF_FAT   | GO:0005198~structural molecule activity       | 28    | 0.00318                  |
|                  | GOTERM_CC_FAT   | GO:0030529~ribonucleoprotein complex          | 30    | 0.00413                  |
| 2.96             | GOTERM_CC_FAT   | GO:0005903~brush border                       | 12    | 3.11 x 10 <sup>-8</sup>  |
|                  | GOTERM_CC_FAT   | GO:0031526~brush border membrane              | 5     | 0.00140                  |
|                  | GOTERM_CC_FAT   | GO:0031253~cell projection membrane           | 5     | 0.0746                   |
|                  | GOTERM_CC_FAT   | GO:0044463~cell projection part               | 8     | 0.446                    |

The functions of the Kidney genes, that were revealed to be associated with hypomethylated PT-DMRs in Supplemental Table 1, were analyzed using the Functional Annotation Clustering tool provides by the DAVID web server. The category column indicates the annotation categories involving terms indicated in the term column. The table shows the clusters having terms for which the lowest P values were less than  $1.0 \times 10^{-4}$ .

**Supplemental Table 4.** Functions of genes associated with hypermethylated PT-DMRs.

| Enrichment Score | Category        | Term                                    | Count | P value               |
|------------------|-----------------|-----------------------------------------|-------|-----------------------|
| 2.60             | GOTERM_CC_FAT   | GO:0005739~mitochondrion                | 28    | $5.87 \times 10^{-5}$ |
|                  | SP_PIR_KEYWORDS | mitochondrion                           | 19    | $1.75 \times 10^{-4}$ |
|                  | GOTERM_CC_FAT   | GO:0005743~mitochondrial inner membrane | 11    | $4.24 \times 10^{-4}$ |
|                  | GOTERM_CC_FAT   | GO:0031966~mitochondrial membrane       | 12    | $6.13 \times 10^{-4}$ |
|                  | GOTERM_CC_FAT   | GO:0019866~organelle inner membrane     | 11    | $6.39 \times 10^{-4}$ |
|                  | GOTERM_CC_FAT   | GO:0005740~mitochondrial envelope       | 12    | $1.01 \times 10^{-3}$ |
|                  | SP_PIR_KEYWORDS | transit peptide                         | 12    | $2.18 \times 10^{-3}$ |
|                  | GOTERM_CC_FAT   | GO:0044429~mitochondrial part           | 13    | $3.38 \times 10^{-3}$ |
|                  | GOTERM_CC_FAT   | GO:0031967~organelle envelope           | 12    | $1.15 \times 10^{-2}$ |
|                  | GOTERM_CC_FAT   | GO:0031975~envelope                     | 12    | $1.18 \times 10^{-2}$ |
|                  | UP_SEQ_FEATURE  | transit peptide:Mitochondrion           | 10    | $2.85 \times 10^{-2}$ |
|                  | GOTERM_CC_FAT   | GO:0031090~organelle membrane           | 14    | $3.67 \times 10^{-2}$ |
|                  | SP_PIR_KEYWORDS | mitochondrion inner membrane            | 5     | $7.53 \times 10^{-2}$ |

The functions of genes with PT-DMRs hypermethylated relative to the liver, which were classified into Kidney expression, were analyzed in the same manner as that for the analysis shown in Supplemental Table 3.



**Supplemental Table 5.** Oligonucleotides used for the bisulfite PCR, and real-time PCR for cDNA and ChIP

Primers used for bisulfite PCR, sequencing

| Name           | Position (mm9)           | F/R | Primer sequence (5' to 3')  |
|----------------|--------------------------|-----|-----------------------------|
| Agt promoter A | chr8:127093342-127093686 | F   | TTGGTGATTTATAGGGGATAGTTTATT |
|                |                          | R   | CAACCTCTATACAAAATAACCCAAAA  |
| Agt promoter B | chr8:127093899-127094370 | F   | AGTTATGTAGATTTTGGGATGAAAGTT |
|                |                          | R   | CCACCCATAATAACCTACAAATAAAAC |

Primers used for bisulfite PCR, COBRA (mouse)

| COBRA Name              | Position (mm9)            | Primer name     | Primer sequence (5' to 3') |
|-------------------------|---------------------------|-----------------|----------------------------|
| Abcb1b_bis              | chr5:8799047-8799399      | Abcb1b_db_bis_L | GTTTTATGTTGTTTGGGTGTTTATT  |
|                         |                           | Abcb1b_db_bis_R | AATTTACTTTCACCTTATACTTTCC  |
| Abcc4_bis3              | chr14:119102417-119102771 | Abcc4_bis3_L    | AAAGGGAAGAGAGGATATTAAGA    |
|                         |                           | Abcc4_bis3_R    | CAACCAAATAATAACAACCCATACAA |
| Abcc4_bis2 <sup>a</sup> | chr14:119104158-119104491 | Abcc4_db_bis2_L | AAGTTTTTTAGGTTTTTATATTTTA  |
|                         |                           | Abcc4_db_bis2_R | TTTCTACCTTTAATAACCATATCCC  |
| Acsm2_bis1              | chr7:126703699-126704056  | Acsm2_bis1_L    | CTATCTCTATTTATTCTTTCTCA    |
|                         |                           | Acsm2_bis1_R    | GTGTGTATTTAGAGGATATATGATT  |
| Acsm3_bis               | chr7:126905846-126906210  | Acsm3_bis_L     | TAGGGGAGGAATAATAAATAGTGAAT |
|                         |                           | Acsm3_bis_R     | AAAAAATAAACAAAAAAAAACAAAAC |
| Acsm5_bis               | chr7:126669794-126670111  | Acsm5_bis_L     | TTAATTTTGTTTTTTTTAGGTTGTGT |
|                         |                           | Acsm5_bis_R     | TTTCTTAACTCTTCCCTTCTTAAT   |

|                          |                           |                 |                               |
|--------------------------|---------------------------|-----------------|-------------------------------|
| Acsm5_bis2               | chr7:126669569-126669812  | Acsm5_bis2_L    | AGGTGAAAAATAGATAGGATTTGGT     |
|                          |                           | Acsm5_bis2_R    | CTAAAAAAAACAAAATTAATAATCAAC   |
| Agt_bis*                 | chr8:127093023-127093304  | Agt_bis_F       | GAATTTTAGAATTGTGATGAAGTTTGT   |
|                          |                           | Agt_bis_R       | AATAACCAAATCCTTTTACCTCCTATA   |
| Apob_bis1                | chr12:7984976-7985261     | Apob_bis_1L     | TTGGAAAATATAAGAAAGTTAAGGT     |
|                          |                           | Apob_bis_1R     | ACAATACACAAAAAACAAAAATCC      |
| Cdc6_bis                 | chr11:98769822-98770210   | Cdc6_db_bis_L   | ATAAAAAACACAACATAATTAATAA     |
|                          |                           | Cdc6_db_bis_R   | TAGTATTAAGGTAGGAAAGGTTGAG     |
| Cldn10_bis2              | chr14:119251094-119251362 | Cldn10_bis2_L   | TTAGTTTTTGTTTTTTGGAGTTGAGG    |
|                          |                           | Cldn10_bis2_R   | AATTATTTCTTATTCTCTCTCTAAA     |
| Cldn18_bis2              | chr9:99610320-99610507    | Cldn18_bis2_L   | TAAGGAAAATAGTATGAGTAAATAT     |
|                          |                           | Cldn18_bis2_R   | CAAAAAAACAAAAAACCCCTACCAC     |
| Cldn18_bis <sup>a</sup>  | chr9:99608935-99609176    | Cldn18_db_bis_L | AGTAGGATAGGATTAAGATTATGTA     |
|                          |                           | Cldn18_db_bis_R | AATCAAAAAAACCATACAAAACC       |
| Cpe_bis                  | chr8:67176010-67176379    | Cpe_bis_L       | GAAAATTAGAAGAGAGGTAAAATTA     |
|                          |                           | Cpe_bis_R       | AACCCAAAAATTATTTTATAAACAC     |
| Cpt1a_bis2               | chr19:3321141-3321590     | Cpt1a_bis2_L    | TTCCTCCAACCTATTTTTATTTT       |
|                          |                           | Cpt1a_bis2_R    | ATAGTTTTTTTTTTAAGGATTGTAGTTTT |
| Cpt2_bis2                | chr4:107594088-107594385  | Cpt2_bis2_F     | GGTTGTGAGTTTAAGGTTTGTTTTAT    |
|                          |                           | Cpt2_bis2_R     | CCTCAAATTAAACTCCTTACCAAAT     |
| Cyp4a10_bis <sup>a</sup> | chr4:115191836-115192187  | Cyp4a10_bis_L   | AAAGGGAATTGGGAAGGGATAGTAT     |
|                          |                           | Cyp4a10_bis_R   | CTAAAAACAAAAATAAACAAACAC      |

|                        |                           |               |                             |
|------------------------|---------------------------|---------------|-----------------------------|
| Cyp4a14_bis            | chr4:115169988-115170321  | Cyp4a14_bis_L | AACAAAAATCTCTAAAAAACCAACC   |
|                        |                           | Cyp4a14_bis_R | TAGGGAAGGAGAAAGGGTATAAAAT   |
| Cyp4b1_bis1            | chr4:115319229-115319486  | Cyp4b1_bis1_L | TTAACAAAAACCCAACCAAAACC     |
|                        |                           | Cyp4b1_bis1_R | GGGAGAAATTATATTTTTAAAGTTTG  |
| Cdc6_bis               | chr11:98769822-98770210   | Cdc6_db_bis_L | ATAAAAAACACAACCTAAATATTAATA |
|                        |                           | Cdc6_db_bis_R | TAGTATTAAGGTAGGAAAGGTTGAG   |
| Dmdgh_bis              | chr13:94444987-94445328   | Dmdgh_bis_L   | TAAAAAAAAGAAAATTGTTAGGG     |
|                        |                           | Dmdgh_bis_R   | TTACAACCTCAAAAACCTATTCTTAC  |
| Enpep_bis              | chr3:129035201-129035486  | Enpep_bis_L   | AATCCTAAAAAACAATAACT        |
|                        |                           | Enpep_bis_R   | TTTAATTGAAAAGGGAAGTTAGTTG   |
| Fbp2_bis2              | chr13:62959666-62959958   | Fbp2_bis2_L   | TAAATCCCAAAACCTCCCTTACT     |
|                        |                           | Fbp2_bis2_R   | AGGATTAATAAAATAAAATTGGGT    |
| Fmo5_bis               | chr3:97428284-97428659    | Fmo5_bis_L    | GGTTAGTAAATGGTTTTTTGATTG    |
|                        |                           | Fmo5_bis_R    | TTTTATTTTATTCTTCTTTCCAC     |
| G6pc_bis               | chr11:101228839-101229131 | G6pc_bis_L    | GGTTGTTTTTGTTGTTTGTGTTTGT   |
|                        |                           | G6pc_bis_R    | AATATTCATTCCTTCTCCATCCTT    |
| G6pc_bis1 <sup>a</sup> | chr11:101229547-101229762 | G6pc_bis1_L   | CCTTACTCTAATTTATTTAACTTT    |
|                        |                           | G6pc_bis1_R   | ATATAGTTTTATGGGGGAGTTTTTGT  |
| Gclm_bis               | chr3:121947769-121948149  | Gclm_bis_L    | TATTTGATTGGTTTGTAAAAAGT     |
|                        |                           | Gclm_bis_R    | TTTCCTTTTACTTTACTTTACCCA    |
| Gcnt1_bis <sup>a</sup> | chr19:17447400-17447702   | Gcnt1_bis_L   | TTGGATTAGGGGATTGAGGAAAATATA |
|                        |                           | Gcnt1_bis_R   | TCCCAAAAACCAAAATCTTTCAAA    |

|                         |                          |                  |                             |
|-------------------------|--------------------------|------------------|-----------------------------|
| Gent1_bis3              | chr19:17434701-17435083  | Gent1_bis3_L     | TTTATTTTTTATTATTTTAGGTGAG   |
|                         |                          | Gent1_bis3_R     | ATCTTCACCACCTTCCAAAAAACA    |
| Gnmt_bis3               | chr17:46863734-46864220  | Gnmt_bis3_F      | AATTGGGGTAAGTTTGTGTGTTAG    |
|                         |                          | Gnmt_bis3_R      | TCCCAAAAACACATAAAACTCATT    |
| Gstz1_bis               | chr12:88489384-88489779  | Gstz1_bis2_F     | TTTAAGTTATTGTTGGAATGGAGTTG  |
|                         |                          | Gstz1_bis2_R     | AAACACTAACAACAAACCACCTAAC   |
| Gys1_bis                | chr7:52690664-52691041   | Gys1_bis_L       | ATTTTTGTGTTTTGTGAAGGGGTT    |
|                         |                          | Gys1_bis_R       | CTTCCCACCTTATATCTAAAAATT    |
| Hadh_bis                | chr5:30483161-30483590   | Hadh_bis_L       | AAAAATAAGAAATTATGTGAAAGAAA  |
|                         |                          | Hadh_bis_R       | AACAAACTCCAAATACAAATCAAACC  |
| Hist2h2aa2_bis          | chr3:96048010-96048335   | Hist2h2aa2_bis_L | GTAATTTTATTTGTTTTAGTTAAAG   |
|                         |                          | Hist2h2aa2_bis_R | ATACTCTTCTCTCATCCCTACAAATTA |
| Hnf4a_bis7 <sup>a</sup> | chr2:163373462-163373761 | Hnf4a_bis7_F     | AAAAATCAATCCTATCCAACATAACC  |
|                         |                          | Hnf4a_bis7_R     | TGAAGTTGGGATATAAATTTAAAAAGG |
| Hnf4a_bis8              | chr2:163373942-163374299 | Hnf4a_bis8_F     | TTTGTTTGGTGGTTTTGTATGGTA    |
|                         |                          | Hnf4a_bis8_R     | AACCAACTCAAAAACACATATACCC   |
| Kif20b_bis <sup>a</sup> | chr19:34995021-34995357  | Kif20b_bis_L     | TTACAAAACCAACACATACAAATAC   |
|                         |                          | Kif20b_bis_R     | AGAAGGAAAAATGAAGAAAGAAATG   |
| Ldhb_bis                | chr6:142455910-142456212 | Ldhb_bis_L       | AGATTTTTTAATTTTTATAGGGATTT  |
|                         |                          | Ldhb_bis_R       | CCCCTACCTATTTCTTCTTTATAATT  |
| Lxr_bis1                | chr2:91033432-91033826   | Lxr_bis1_F       | TTAGGAAGAGATGTTTTGTGGTTG    |
|                         |                          | Lxr_bis1_R       | CCACTACCCAATAATACATCAAAA    |

|                         |                          |                |                             |
|-------------------------|--------------------------|----------------|-----------------------------|
| Met_bis <sup>a</sup>    | chr6:17438380-17438731   | Met_bis_L      | TAGTTTTTTGTTTTTGGAAATTTTGG  |
|                         |                          | Met_bis_R      | AACTTTCCTTCTTTTACTAACAATA   |
| Met_bis1                | chr6:17438379-17438727   | Met_bis1_L     | TTAGTTTTTTGTTTTTGGAAATTTTGG |
|                         |                          | Met_bis1_R     | TTCCCTTCTTTTACTAACAATACTT   |
| Met_bis2                | chr6:17441163-17441486   | Met_bis2_L     | CTTCCATTTCTCTCTTTAATTTCTAA  |
|                         |                          | Met_bis2_R     | GGATATTTTTTGAAGGTTTTTTGTTA  |
| Met_bis2n               | chr6:17435477-17435701   | Met_bis2n_L    | GGTGATTTGGTTTTATTTGTTATGTG  |
|                         |                          | Met_bis2n_R    | CATATAATTTCTACCTCCATCCATT   |
| Mgea5_bis <sup>a</sup>  | chr19:45828419-45828766  | Mgea5_gb_bis_L | CTTAAACAAAACAAAACAAAAAACC   |
|                         |                          | Mgea5_gb_bis_R | GGATTGAAAATGAAATAGAATTGAG   |
| Nudt19_bis              | chr7:36342624-36342990   | Nudt19_bis_L   | AGGAAGGAGTTAAGTTTTGATTTAA   |
|                         |                          | Nudt19_bis_R   | AAAATATAATTATAACCCTCTAACAC  |
| Pck1_bis                | chr2:172978395-172978680 | Pck1_bis_L     | AGTTTAATTATTATTTTTTTGGAGT   |
|                         |                          | Pck1_bis_R     | CTACCTACCTTTCTTCCTTTTAAAAA  |
| Pck1_bisn               | chr2:172979616-172979782 | Pck1_bisn_L    | AAATAAATAAAACCAAACCCCAAACC  |
|                         |                          | Pck1_bisn_L    | TAGGATTTGTAGAGAATATTTAAT    |
| Pck1_bisn1 <sup>a</sup> | chr2:172978288-172978547 | Pck1_bisn1_L   | ACATCAACAACAACAACAATCAAAA   |
|                         |                          | Pck1_bisn1_R   | AAATATTATATAGAAGGGAGGATAG   |
| Pdk3_bis2               | chrX:91078798-91079165   | Pdk3_bis2_L    | AATTAGAAAAAAAAAAGGTAAAAG    |
|                         |                          | Pdk3_bis2_R    | CACCCAAAAAAAAATAAATAACAACC  |
| Pdp1_bis                | chr4:11892199-11892514   | Pdp1_bis_L     | ACCCCATCCATTCTTTATAATATACT  |
|                         |                          | Pdp1_bis_R     | GTTTTTTTTTATTTTTGTAGATATTG  |

|                          |                           |                  |                                |
|--------------------------|---------------------------|------------------|--------------------------------|
| Proc_bis1                | chr18:32297365-32297769   | Proc_bis1_F      | ATTGTAAGATTGTGAAGGATTGTGG      |
|                          |                           | Proc_bis1_R      | CTAATATCCCCCAAACCAAATAAAC      |
| Serpina1e_bis1           | chr12:105194600-105194996 | Serpina1e_bis1_F | TTTTTGGGAGTAGGGGTAATATAGG      |
|                          |                           | Serpina1e_bis1_R | ACACAAATCTCCCAAACCACTATAC      |
| Slc2a5_bis1 <sup>a</sup> | chr4:149493621-149493821  | Slc2a5_bis1_L    | ATTATTTCTATACCCACCTCTCA        |
|                          |                           | Slc2a5_bis1_R    | GTTTTTTTTTAGGAAAATTTTTTTG      |
| Slc2a5_bis2              | chr4:149493893-149494137  | Slc2a5_bis2_L    | AAGGGTGAAGGATAAGAAGAAAGA       |
|                          |                           | Slc2a5_bis2_R    | CAAACAAACTAAATCCCCAAAAA        |
| Slc5a2_bis1 <sup>a</sup> | chr7:135408837-135409185  | Slc5a2_bis1_L    | AGGAATATGTATGTTTTGTTGATTGTT    |
|                          |                           | Slc5a2_bis1_R    | AACTAATCCCTAAATTCCCCTAAAA      |
| Slc5a2_bis               | chr7:135411459-135411821  | Slc5a2_bis_L     | CAAACCCTAAACTAAAACATTTAC       |
|                          |                           | Slc5a2_bis_R     | GATATTTAAGAAGGTTAGAAGTTT       |
| Slco1a_F <sup>a</sup>    | chr6:141895647-141896048  | Slco1a_F         | TGTGTGTGTATGGATTTGTTTGTTT      |
|                          |                           | Slco1a_R         | AACCACTCTTCCCAAATTACTCTAA      |
| Socs2_bis                | chr10:94880798-94881161   | Socs2_db_bis_L   | TTTTCTCTTAAATAATTCTATACAC      |
|                          |                           | Socs2_db_bis_R   | ATTTTTGTATATTGTAGAGGTTTAA      |
| Suclg2_bis               | chr6:95666262-95666607    | Suclg2_bis_L     | AATTTATTTTTTTTCCCACCAAACC      |
|                          |                           | Suclg2_bis_R     | GGGTGAATGTTTTTTTTTTTTTGTTAATAG |

<sup>a</sup> Primers used in Table 1, Figures 1, 2 and 4, and Supplemental Figures 3 and 5D.

Primers used for bisulfite PCR, COBRA (human)

| COBRA Name | Position (GRCh37/hg19)   | Primer name | Primer sequence (5' to 3')  |
|------------|--------------------------|-------------|-----------------------------|
| AGT_bis    | chr1:230850702-230850705 | AGT_bis_L   | CCAGTGTAGCTGGGGAGACTGTAAAC  |
|            |                          | AGT_bis_R   | CACTGAAGGGACAGGAAGGAAGATCCT |

Primers used for real-time PCR for cDNA

| Name         | Accession Number | F/R | Sequence (5' to 3')   |
|--------------|------------------|-----|-----------------------|
| Acaca        | NM_133360        | F   | CTGGAGGACCCAACAACAAC  |
|              |                  | R   | GAGCAGTTCTGGGAGTTTCG  |
| Cyp4a10      | NM_010011        | F   | TCCCATCACCTCCTTTTCAC  |
|              |                  | R   | TGCACGACACAATTTCTGT   |
| Cyp4a14      | NM_007822        | F   | CTCGGGGAGCAATATACGAG  |
|              |                  | R   | CATTCAACAGGAGCAAACCA  |
| $\beta$ ENaC | NM_011325        | F   | TCGGAACTTCACGCCTATCT  |
|              |                  | R   | CCGATGTCCAGGATCAACTT  |
| G6pc         | NM_008061        | F   | CGAGGAAAGAAAAAGCCAAC  |
|              |                  | R   | CCAGAATCCAACCACAAGA   |
| Gcnt1        | NM_010265        | F   | CTGGAACCCAATGAAACCTT  |
|              |                  | R   | CAACAGCCATGCTAAATGGA  |
| Hnf4a        | NM_008261        | F   | AGAGGTTCTGTCCCAGCAGA  |
|              |                  | R   | ATGTACTTGGCCCACTCGAC  |
| Kif20b       | NM_183046        | F   | TTTCCTTAGTCGCCTCAAAC  |
|              |                  | R   | ATCCAAAACCTTGCACACAGC |

|        |              |   |                      |
|--------|--------------|---|----------------------|
| Met    | NM_008591    | F | AGCATTTTTACGGACCCAAC |
|        |              | R | ACAGCCGGAAGAGTTTCTCA |
| Mgea5  | NM_023799    | F | TACCAAGCCAAATGGTGACA |
|        |              | R | ACACCTCCTGCTCTTCATGG |
| NCC    | NM_001205311 | F | CCTCCATCACCAACTCACCT |
|        |              | R | CCGCCCACTTGCTGTAGTAT |
| NKCC2  | NM_183354    | F | TGTGAAGTTTGGATGGGTGA |
|        |              | R | CAGGAGAGGCGAATGAAGAG |
| Pck1   | NM_011044    | F | AGGAGTACGGGCAGTTGCT  |
|        |              | R | TCTGCTCTTGGGTGATGATG |
| Sglt2  | NM_133254    | F | CTGAACTTGGGGAGCAGAAG |
|        |              | R | GGCAGCGATAACCAGAATGT |
| Slc2a5 | NM_019741    | F | TACAACGTAGCTGCCGTCAA |
|        |              | R | CAGCGTCAAGGTGAAGGACT |
| Slc1a1 | NM_013797    | F | TTAAAGCCAACGCAAGATCC |
|        |              | R | GGGAGTTTCACCAATTCCAC |

Primers used for real-time PCR for ChIP (mouse)

| Name | Position (mm9)           | F/R | Sequence (5' to 3')  |
|------|--------------------------|-----|----------------------|
| Agt  | chr8:127093635-127093725 | F   | TACTCAAGGGGTGGAGATGG |
|      |                          | R   | AGCCTGGATTCTCATGGTTC |



|         |                           |   |                      |
|---------|---------------------------|---|----------------------|
| Abcc4   | chr14:119105134-119105270 | F | GTGTAAGGCTGTGCAGGAAA |
|         |                           | R | GCGTGTTCTTCTGGTGAGTG |
| Slco1a1 | chr6:141895639-141895725  | F | CAACAGAAGGCCACTCTTCC |
|         |                           | R | TGAACCACCACCTCCCTATC |

Primers used for real-time PCR for ChIP (human)

| Name | Position (GRCh37/hg19)   | F/R | Sequence (5' to 3')  |
|------|--------------------------|-----|----------------------|
| AGT  | chr1:230850646-230850747 | F   | AACAGGGCATGACAGAGACC |
|      |                          | R   | TAAGGCTGGACACATCACCA |

**A**

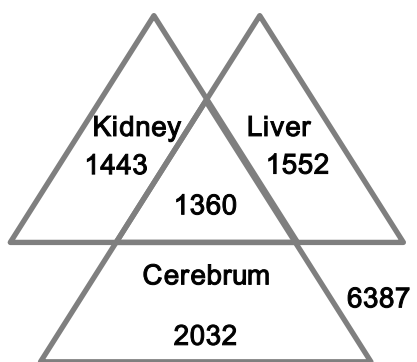

**B**

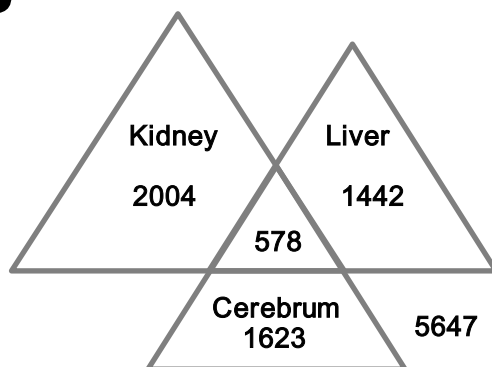

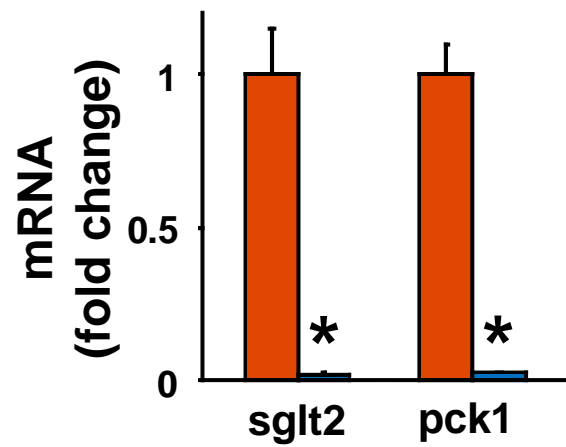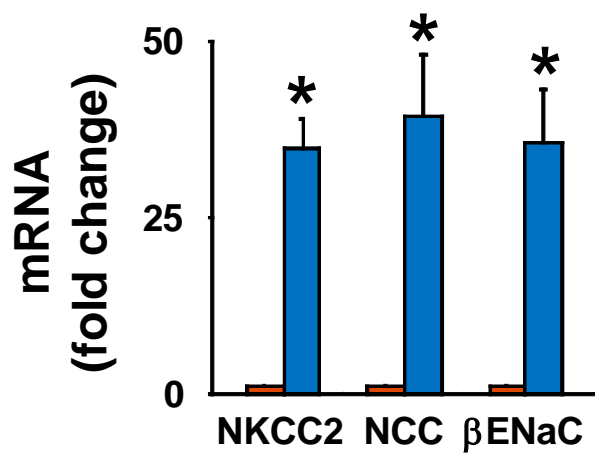

Supplemental Figure 2

**A**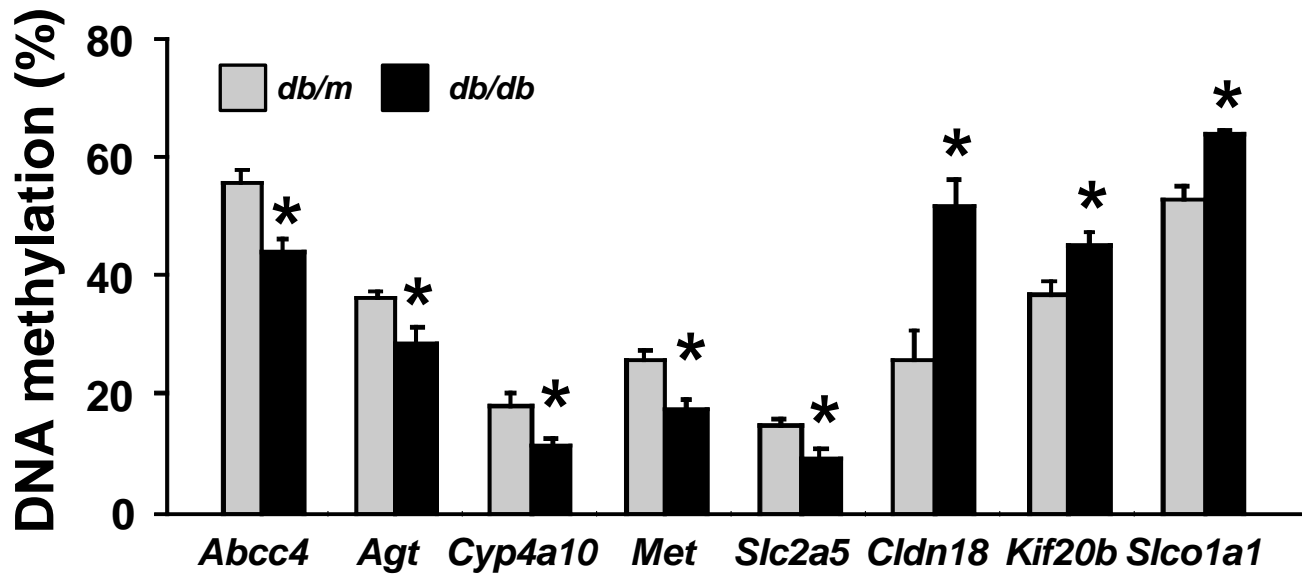**B**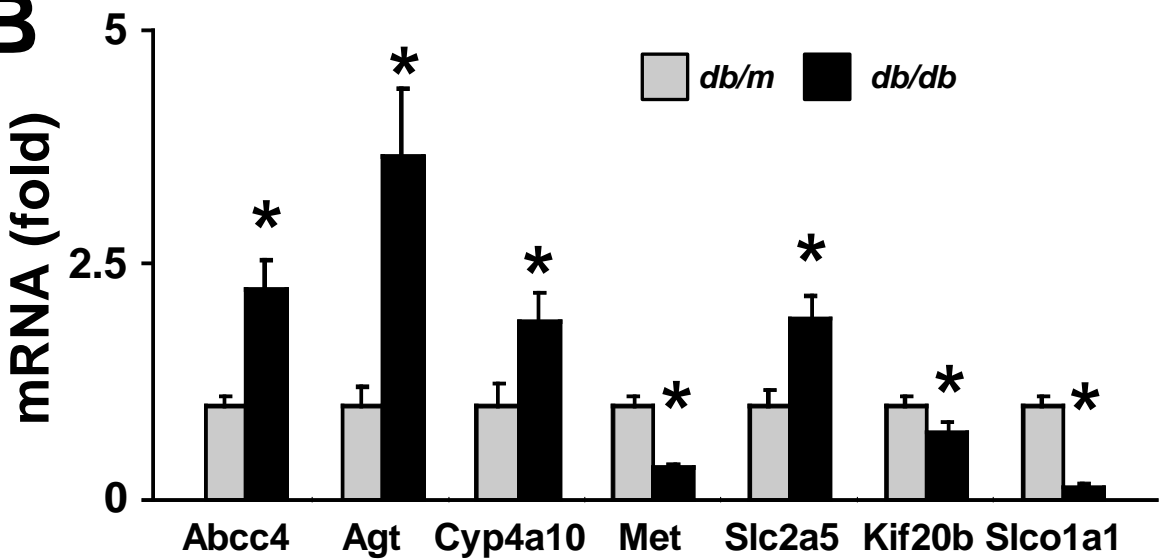

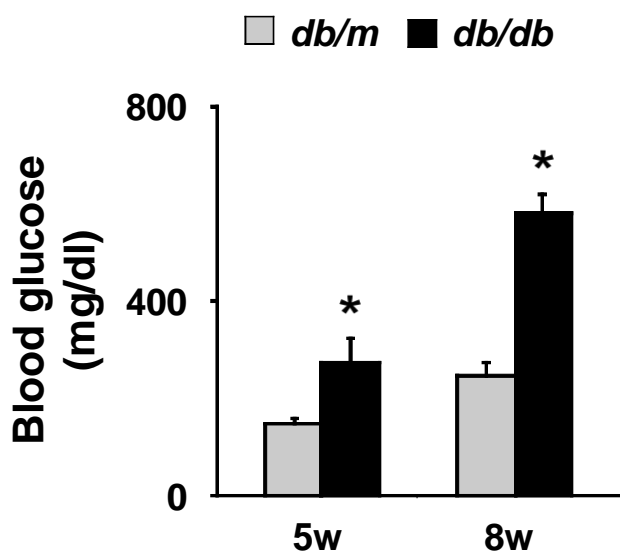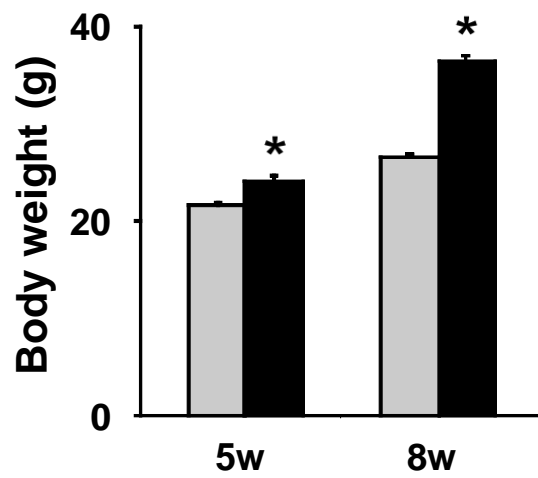

Supplemental Figure 4

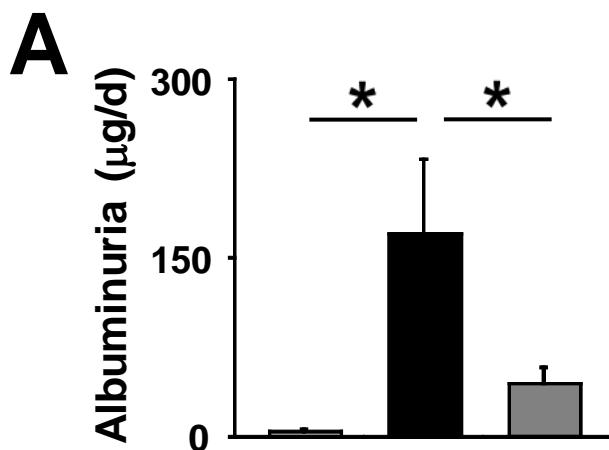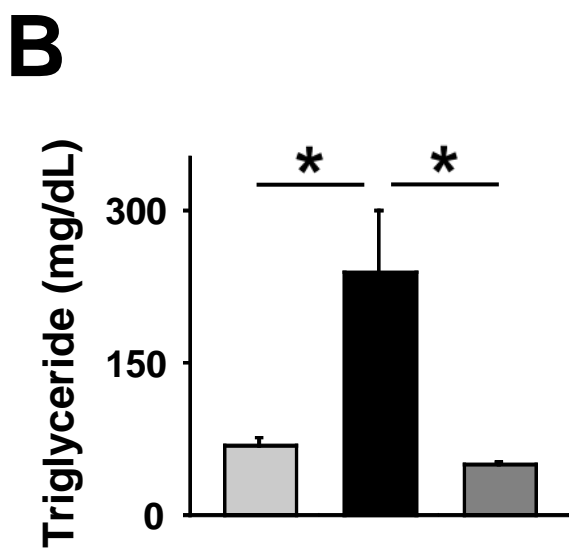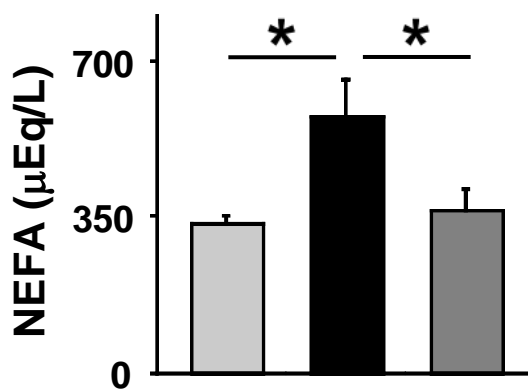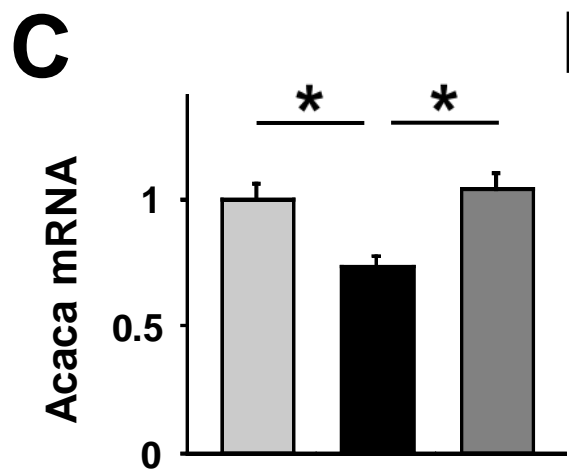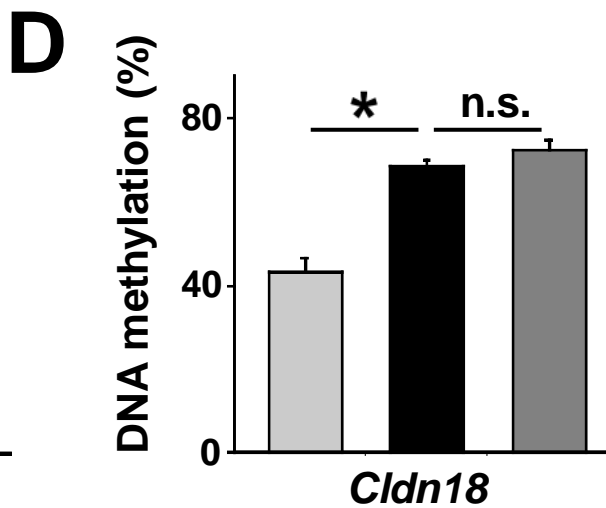

Supplemental Figure 5

db/m db/db db/db piog

**A**

**H3K9Ac**

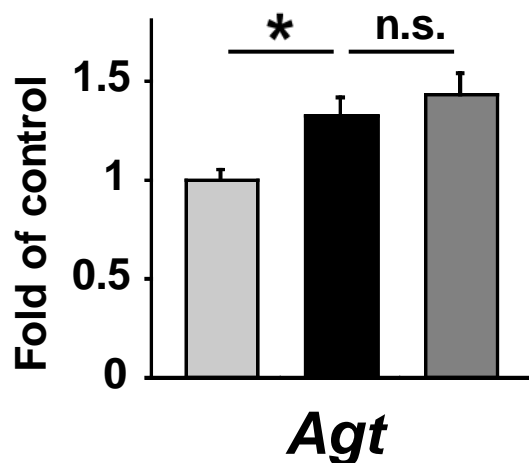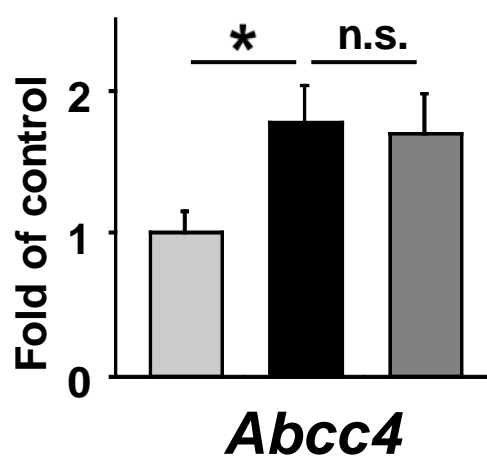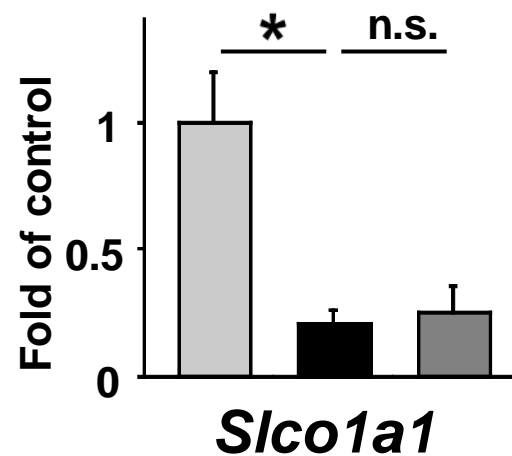

**B**

**H3K4me3**

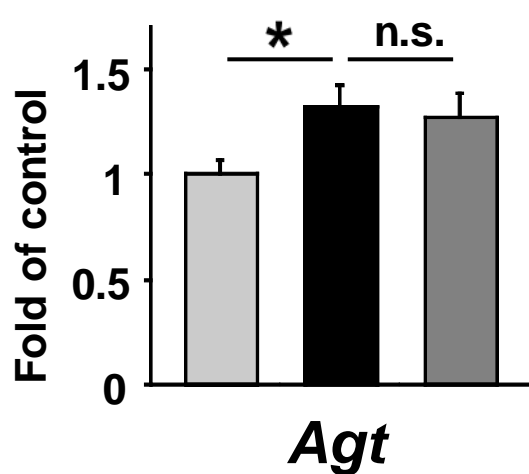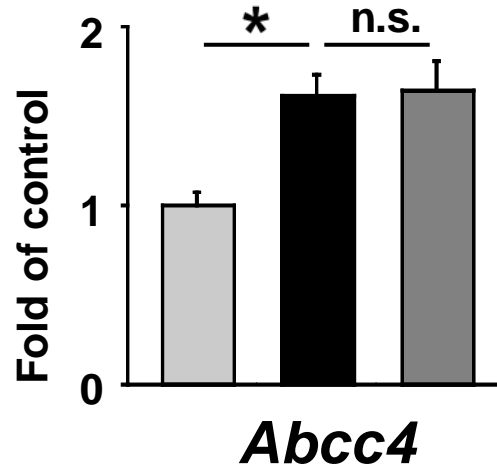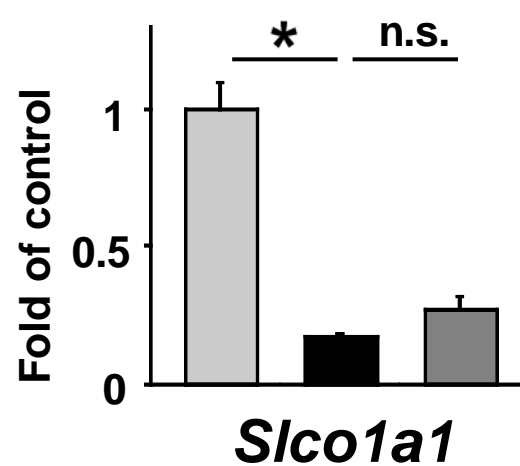

Supplemental Figure 6
